# Supplementary material
Source: ML conference proceedings conference paper supplement (https://openaccess.thecvf.com/content/CVPR2021/html/Muller_Seeing_Behind_Objects_CVPR_2021_paper.html)
Supplement: Supplementary file 1 [file Muller_Seeing_Behind_Objects_CVPR_2021_supplemental.zip]

## Appendix

In this appendix, we provide further details about our proposed method. Specifically, we describe the network architectures in detail in Section B and provide more quantitative results in Section A.

### A. Additional Quantitative Evaluation

We provide per-frame model performance on real-world ScanNet+Scan2CAD and the synthetic dataset DYN-SYNTH. In Table 5, we show class-wise detection results evaluated as mean average precision at a 3D IoU of 0.5 (mAP@0.5). The per-frame completion performance is evaluated in Table 6 using a mean average precision metric with mesh IoU threshold of 0.25 (mAP@0.25).

### B. Network Details

We detail the architecture of our network in Figure 6. We provide the convolution parameters as (n\_in, n\_out, kernel\_size, stride, padding), where stride and padding default to 1 and 0, respectively. Each convolution (except the last) is followed by batch normalization and a ReLU.

|                  | bathtub | bed  | bookshelf | cabinet | chair | desk | sink | sofa | table | toilet | mAP  |
|------------------|---------|------|-----------|---------|-------|------|------|------|-------|--------|------|
| DYNSYNTH         | 49.3    | 38.4 | 12.5      | 6.3     | 44.1  | 46.8 | 27.6 | 32.3 | 38.4  | 63.1   | 35.8 |
| ScanNet+Scan2CAD | 38.7    | -    | 12.9      | 4.6     | 41.2  | -    | -    | 26.4 | 29.2  | -      | 25.6 |

Table 5. 3D Detection results on DYNSYNTH and ScanNet with Scan2CAD targets at mAP@0.5.

|                  | bathtub | bed  | bookshelf | cabinet | chair | desk | sink | sofa | table | toilet | mAP  |
|------------------|---------|------|-----------|---------|-------|------|------|------|-------|--------|------|
| DYNSYNTH         | 34.8    | 23.6 | 12.7      | 11.4    | 38.4  | 34.1 | 32.2 | 41.1 | 29.9  | 52.6   | 31.1 |
| ScanNet+Scan2CAD | 20.4    | -    | 8.6       | 12.7    | 24.4  | -    | -    | 23.9 | 12.2  | -      | 17.1 |

Table 6. Instance Completion results on DYNSYNTH and ScanNet with Scan2CAD targets at mAP@0.25.

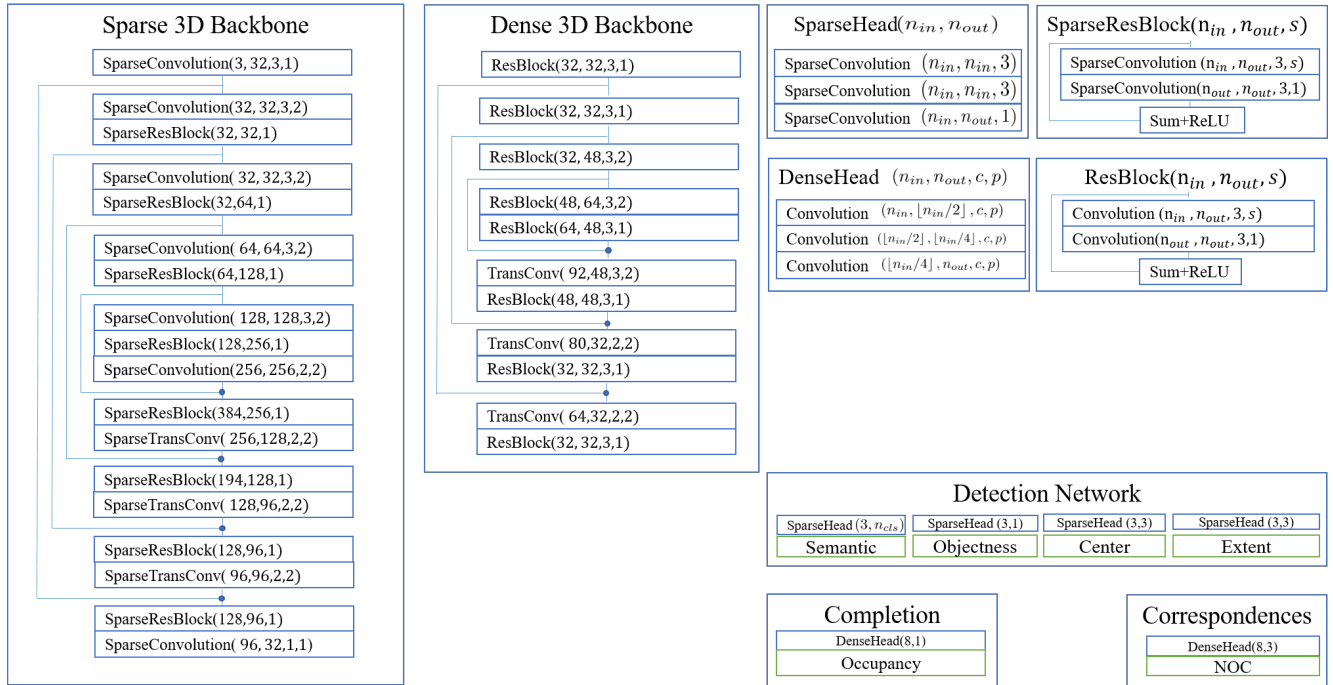

Figure 6. Network architecture specification for our approach. Dots indicate concatenation, outputs are highlighted in green.
