# Supplementary material
Source: ML conference proceedings conference paper supplement (https://openaccess.thecvf.com/content/CVPR2021/html/Muller_Seeing_Behind_Objects_CVPR_2021_paper.html)
Supplement: Supplementary file 2 [file Muller_Seeing_Behind_Objects_CVPR_2021_supplemental.zip]

Archive with 2 entries (2 files):
- Appendix.pdf
- supplementary_video.mp4
